# Supplementary material
Source: MDPI journal article supplement (https://www.mdpi.com/2073-4441/12/10/2946)
Supplement: s1 [file s1 › water-940464-supplementary.pdf]

## Supplementary Materials

### A. Precipitation during the planting year 2016 to 2018

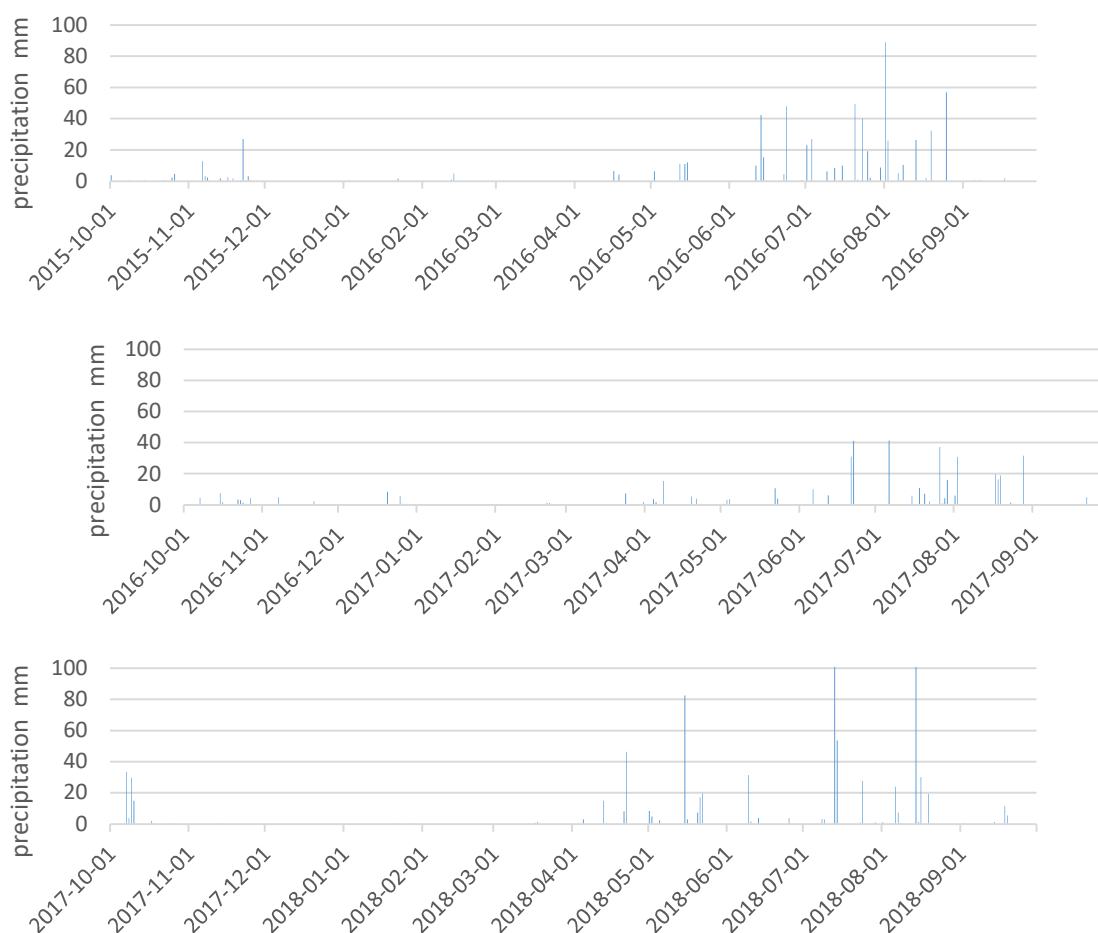

**Figure A1.** Precipitation during the planting year 2016 to 2018.

Note: The planting year 2016, which annual rainfall amount was 692 mm, belongs an average rainfall year according to the North China Plain climate. The planting year 2017, which annual rainfall amount was 459 mm, belongs to a drought year with little rain. The planting year 2018, which annual rainfall amount was 813mm with several heavy rainfall events (115.4mm on July 13 and 158.9mm on August 14, which could not be displayed due to the limitation of the vertical axis, so it is marked), belongs to a rainy year.

## B. The specific calculation methods of the crop water consumption in different kinds of cropping systems

The crops' water consumption numerically equals each crop's water requirement, which also consistent with the evapotranspiration of the crop in the field, and it was influenced by climate. Here we use CROPWAT 8.0 to calculate single crop's evapotranspiration. Then we added the crop's evapotranspiration together as for the system's crop water consumption.

In CROPWAT 8.0, we need crop information as showed in below table B1.

**Table B1.** The length of crop development stages and crop coefficients.

| Crop             | Planting year | Sowing date | Initial stage (days) | Rapid Development stage (days) | Mid stage (days) | Late stage (days) | K <sub>c</sub> ini | K <sub>c</sub> mid | K <sub>c</sub> end |
|------------------|---------------|-------------|----------------------|--------------------------------|------------------|-------------------|--------------------|--------------------|--------------------|
| Winter wheat     | 2016          | 10/15       | 30                   | 137                            | 42               | 30                | 0.58               | 1.17               | 0.25               |
|                  | 2017          | 10/12       | 30                   | 137                            | 39               | 29                | 0.52               | 1.17               | 0.25               |
|                  | 2018          | 10/13       | 30                   | 139                            | 39               | 29                | 0.55               | 1.15               | 0.25               |
| Summer maize     | 2016          | 6/20        | 17                   | 31                             | 35               | 25                | 0.29               | 1.20               | 0.35               |
|                  | 2017          | 6/9         | 18                   | 31                             | 37               | 26                | 0.3                | 1.18               | 0.35               |
|                  | 2018          | 6/12        | 17                   | 31                             | 37               | 26                | 0.25               | 1.18               | 0.35               |
| Spring maize I   | 2016          | 4/9         | 23                   | 37                             | 44               | 30                | 0.34               | 1.2                | 0.35               |
|                  | 2016          | 4/15        | 21                   | 36                             | 42               | 29                | 0.34               | 1.2                | 0.35               |
| Spring maize II  | 2017          | 4/4         | 22                   | 36                             | 43               | 30                | 0.35               | 1.2                | 0.35               |
|                  | 2018          | 4/7         | 21                   | 36                             | 42               | 29                | 0.3                | 1.19               | 0.35               |
|                  | 2016          | 5/17        | 20                   | 35                             | 40               | 29                | 0.28               | 1.18               | 0.35               |
| Spring maize III | 2017          | 5/19        | 19                   | 34                             | 39               | 28                | 0.25               | 1.19               | 0.35               |
|                  | 2018          | 5/24        | 18                   | 32                             | 37               | 26                | 0.25               | 1.18               | 0.35               |
|                  | 2016          | 9/24        | 29                   | 128                            | 48               | 16                | 0.4                | 1.05               | 0.99               |
| Rye              | 2017          | 10/1        | 30                   | 130                            | 49               | 18                | 0.52               | 1.04               | 1                  |
|                  | 2018          | 9/30        | 30                   | 126                            | 30               | 10                | 0.5                | 1.07               | 1.02               |
|                  | 2016          | 9/24        | 40                   | 100                            | 35               | 16                | 0.44               | 1                  | 0.91               |
| Spinach          | 2017          | 10/1        | 40                   | 98                             | 30               | 14                | 0.53               | 1                  | 0.9                |
|                  | 2018          | 9/30        | 40                   | 99                             | 30               | 15                | 0.5                | 1.01               | 0.96               |
|                  | 2016          | 9/24        | 38                   | 98                             | 45               | 10                | 0.44               | 1.15               | 0.91               |
| Vetch            | 2017          | 10/1        | 40                   | 102                            | 53               | 13                | 0.53               | 1.15               | 0.9                |
|                  | 2018          | 9/30        | 40                   | 102                            | 53               | 13                | 0.5                | 1.16               | 0.91               |
|                  | 2016          | 3/15        | 19                   | 24                             | 40               | 24                | 0.1                | 1.15               | 0.76               |
| Potato           | 2017          | 2/28        | 20                   | 25                             | 40               | 25                | 0.1                | 1.15               | 0.75               |
|                  | 2018          | 3/6         | 20                   | 25                             | 40               | 25                | 0.1                | 1.15               | 0.75               |
|                  | 2016          | 3/15        | 14                   | 24                             | 32               | 15                | 0.37               | 1.15               | 0.3                |
| Pea              | 2017          | 2/28        | 15                   | 25                             | 34               | 16                | 0.4                | 1.15               | 0.3                |
|                  | 2018          | 3/7         | 15                   | 25                             | 35               | 17                | 0.4                | 1.16               | 0.3                |
|                  | 2016          | 5/17        | 22                   | 27                             | 50               | 25                | 0.3                | 1.13               | 0.48               |
| Soybean          | 2017          | 5/19        | 21                   | 26                             | 48               | 25                | 0.25               | 1.14               | 0.48               |
|                  | 2018          | 5/24        | 20                   | 25                             | 45               | 23                | 0.25               | 1.13               | 0.48               |

Note: Spring maize I represents the maize planted in vetch - spring maize plots in the 2016 planting year, the sowing date was April 9. Its sowing date in the 2017 and 2018 planting years was the same as spring maize III. Spring maize II is the maize of the potato/spring maize cropping system, the sowing date was usually earlier than the other spring maize. Spring maize III represents the maize in other cropping systems, they had the same sowing date in the middle of May. K<sub>c</sub> ini、K<sub>c</sub> mid were calibrated by the wind speed, the humidity and the plant height of actual field situation. The calibration method and the process are shown in FAO 56. The vetch's growth stage length and the crop coefficient were not showed in FAO 56, we used bean's information as the substitution. Potatoes were planted with plastic mulching. K<sub>c</sub> ini=0.1, according to FAO 56, and K<sub>c</sub> mid and K<sub>c</sub> end were reduced by 10–30%, here we used 15%.

There are four kinds of cropping systems: mono-cropping, rotation cropping, relay cropping and intercropping system in this study. They have different crop characteristics. It is necessary to calculate the system's crop water consumption respectively. The water consumption of the mono-cropping system was the water requirement of the spring maize. The water consumption of the rotation cropping system (including winter wheat-summer maize system) was the sum of the water requirement of the preceding crop and the successive crop. In terms of the relay cropping

system and the intercropping system, the evapotranspiration of the preceding crops was adjusted according to the planting density (as compared with the mono-culturing density), and then added the evapotranspiration of the spring maize (all cropping systems in this study had the same maize density and were consistent with local farmers), so as to acquire the system's crop water demand. The reason why we have to do this adjustment was because in relay cropping and inter-cropping systems, crops (like potatoes, peas and soybeans) do not reach the requirement of "large-area" which FAO 56 asked for due to the space left for the following maize. Thus, the evapotranspiration of these crops was adjusted according to the difference of actual density in relay cropping system (or inter-cropping system) and the density in mono-culture, so as to calculate the corresponding crop evapotranspiration. The planting density of mono-cropping potato was calculated according to row spacing of 60 cm and plant spacing of 30 cm, which was the twice of the planting density in this study. The planting density of mono-cropping pea was calculated according to the row spacing of 30 cm and the plant spacing of 8 cm, which was twice of that in this study. The planting density of mono-cropping soybeans was 200,000-240,000 plants/ ha, which about twice of this study.

At the same time, in our field experiment, soybean growing was seriously affected by the shade of maize, the evapotranspiration of the soybean was lower than that of the non-shade soybean, and it was estimated that the evapotranspiration was reduced by 50% according to the plant height, the leaf extension and the pod setting. So, in conclusion, the adjustment coefficient of potato and pea was 0.5, soybean was 0.25.

For the amount of green water and the blue water of different kinds of cropping systems: the mono-cropping system was as same as the spring maize's; the rotation cropping system's was calculated by adding the preceding crop's and the successive crop's, respectively. For the relay cropping and intercropping system, the evapotranspiration of the system should be calculated first by the method mentioned in last paragraph, then compared the system's evapotranspiration with the effective rainfall of the corresponding ten-day period, then the green water amount of the ten-day was obtained. The sum of the green water of each ten-day period was the total amount of the green water. Finally, the amount of the blue water was the difference of the evapotranspiration of the system and the green water of the system. The detailed calculation process is shown in below tables (from B2 to B4). The unit of this part need to be transformed to m<sup>3</sup>/ha.

**Table B2.** The calculation of the water requirement of the Potato/Maize system.

| Date               | The order of ten-day y | Mono-potato ET <sub>c</sub><br>mm/dec | Relay-potato ET <sub>c</sub><br>mm/dec | Maize ET <sub>c</sub><br>mm/dec | Effective rainfall<br>mm/dec | System ET <sub>c</sub><br>mm/dec | Green water<br>mm/dec | Blue water<br>mm/dec |
|--------------------|------------------------|---------------------------------------|----------------------------------------|---------------------------------|------------------------------|----------------------------------|-----------------------|----------------------|
| 2016/3             | 1                      | 1.5                                   | 0.75                                   |                                 | 0                            | 0.75                             | 0                     | 0.75                 |
| 2016/3             | 2                      | 3.9                                   | 1.95                                   |                                 | 0                            | 1.95                             | 0                     | 1.95                 |
| 2016/4             | 3                      | 10.4                                  | 5.2                                    |                                 | 0                            | 5.2                              | 0                     | 5.2                  |
| 2016/4             | 4                      | 22.4                                  | 11.2                                   | 6.4                             | 10                           | 17.6                             | 10                    | 7.6                  |
| 2016/4             | 5                      | 48.9                                  | 24.45                                  | 14.6                            | 0                            | 39.05                            | 0                     | 39.05                |
| 2016/5             | 6                      | 49.3                                  | 24.65                                  | 15.2                            | 6                            | 39.85                            | 6                     | 33.85                |
| 2016/5             | 7                      | 54.2                                  | 27.1                                   | 28                              | 28.4                         | 55.1                             | 28.4                  | 26.7                 |
| 2016/5             | 8                      | 60.2                                  | 30.1                                   | 44.8                            | 0                            | 74.9                             | 0                     | 74.9                 |
| 2016/6             | 9                      | 53.2                                  | 26.6                                   | 53                              | 0                            | 79.6                             | 0                     | 79.6                 |
| 2016/6             | 10                     | 51.6                                  | 25.8                                   | 63.9                            | 45.6                         | 89.7                             | 45.6                  | 44.1                 |
| 2016/6             | 11                     | 43.8                                  | 21.9                                   | 70.3                            | 39.5                         | 92.2                             | 39.5                  | 52.7                 |
| 2016/7             | 12                     |                                       |                                        | 38                              | 41                           | 38                               | 38                    | 0                    |
| 2016/7             | 13                     |                                       |                                        | 41.7                            | 45.8                         | 41.7                             | 41.7                  | 0                    |
| 2016/7             | 14                     |                                       |                                        | 50.2                            | 46.7                         | 50.2                             | 46.7                  | 3.5                  |
| 2016/8             | 15                     |                                       |                                        | 22.8                            | 54.7                         | 22.8                             | 22.8                  | 0                    |
| 2016/8             | 16                     |                                       |                                        | 12.5                            | 43.1                         | 12.5                             | 12.5                  | 0                    |
| 2016 planting year |                        |                                       |                                        |                                 |                              | 661.1                            | 291.20                | 369.90               |
| 2017/2             | 1                      | 0.2                                   | 0.1                                    |                                 | 0.3                          | 0.1                              | 0.1                   | 0.00                 |
| 2017/3             | 2                      | 2.4                                   | 1.2                                    |                                 | 0                            | 1.2                              | 0                     | 1.20                 |
| 2017/3             | 3                      | 2.6                                   | 1.3                                    |                                 | 0                            | 1.3                              | 0                     | 1.30                 |
| 2017/3             | 4                      | 10.2                                  | 5.1                                    |                                 | 9.2                          | 5.1                              | 5.1                   | 0.00                 |
| 2017/4             | 5                      | 21.8                                  | 10.9                                   | 4.9                             | 18.8                         | 15.8                             | 15.8                  | 0.00                 |
| 2017/4             | 6                      | 41.6                                  | 20.8                                   | 12.1                            | 5.8                          | 32.9                             | 5.8                   | 27.10                |
| 2017/4             | 7                      | 57.7                                  | 28.85                                  | 19                              | 4                            | 47.85                            | 4                     | 43.85                |
| 2017/5             | 8                      | 57.4                                  | 28.7                                   | 29.7                            | 6.7                          | 58.4                             | 6.7                   | 51.70                |
| 2017/5             | 9                      | 72.9                                  | 36.45                                  | 53.3                            | 0                            | 89.75                            | 0                     | 89.75                |
| 2017/5             | 10                     | 72.3                                  | 36.15                                  | 73.1                            | 13.6                         | 109.25                           | 13.6                  | 95.65                |
| 2017/6             | 11                     | 52.1                                  | 26.05                                  | 67.5                            | 9.5                          | 93.55                            | 9.5                   | 84.05                |
| 2017/6             | 12                     | 30.3                                  | 15.15                                  | 67                              | 6                            | 82.15                            | 6                     | 76.15                |
| 2017/6             | 13                     |                                       |                                        | 55.9                            | 47.2                         | 55.9                             | 47.2                  | 8.70                 |
| 2017/7             | 14                     |                                       |                                        | 58.8                            | 33.3                         | 58.8                             | 33.3                  | 25.50                |
| 2017/7             | 15                     |                                       |                                        | 59.5                            | 21.2                         | 59.5                             | 21.2                  | 38.30                |
| 2017/7             | 16                     |                                       |                                        | 19.6                            | 43.2                         | 19.6                             | 19.6                  | 0.00                 |
| 2017/8             | 17                     |                                       |                                        | 22.7                            | 30.4                         | 22.7                             | 22.7                  | 0.00                 |
| 2017/8             | 18                     |                                       |                                        | 2.9                             | 40.5                         | 2.9                              | 2.9                   | 0.00                 |
| 2017 planting year |                        |                                       |                                        |                                 |                              | 756.75                           | 213.50                | 543.25               |
| 2018/3             | 1                      | 1                                     | 0.5                                    |                                 | 0                            | 0.5                              | 0                     | 0.50                 |
| 2018/3             | 2                      | 2.5                                   | 1.25                                   |                                 | 1.9                          | 1.25                             | 1.25                  | 0                    |
| 2018/3             | 3                      | 6.8                                   | 3.4                                    |                                 | 0                            | 3.4                              | 0                     | 3.4                  |
| 2018/4             | 4                      | 23.5                                  | 11.75                                  | 5.3                             | 3                            | 17.05                            | 3                     | 14.05                |
| 2018/4             | 5                      | 45.8                                  | 22.9                                   | 12.7                            | 14.3                         | 35.6                             | 14.3                  | 21.3                 |
| 2018/4             | 6                      | 44.4                                  | 22.2                                   | 11.8                            | 40.1                         | 34                               | 34                    | 0                    |
| 2018/5             | 7                      | 50.9                                  | 25.45                                  | 22.8                            | 14.5                         | 48.25                            | 14.5                  | 33.75                |
| 2018/5             | 8                      | 37                                    | 18.5                                   | 24.1                            | 50.9                         | 42.6                             | 42.6                  | 0                    |
| 2018/5             | 9                      | 65.4                                  | 32.7                                   | 59.9                            | 30.2                         | 92.6                             | 30.2                  | 62.4                 |
| 2018/6             | 10                     | 63.1                                  | 31.55                                  | 73.2                            | 27.8                         | 104.75                           | 27.8                  | 76.95                |
| 2018/6             | 11                     | 43.8                                  | 21.9                                   | 60.1                            | 3.7                          | 82                               | 3.7                   | 78.3                 |
| 2018/6             | 12                     | 15.8                                  | 7.9                                    | 76.6                            | 3.7                          | 84.5                             | 3.7                   | 80.8                 |
| 2018/7             | 13                     |                                       |                                        | 53.2                            | 6.2                          | 53.2                             | 6.2                   | 47                   |
| 2018/7             | 14                     |                                       |                                        | 49                              | 58.6                         | 49                               | 49                    | 0                    |
| 2018/7             | 15                     |                                       |                                        | 52.6                            | 25.4                         | 52.6                             | 25.4                  | 27.2                 |
| 2018/8             | 16                     |                                       |                                        | 24.6                            | 27.8                         | 24.6                             | 24.6                  | 0                    |
| 2018/8             | 17                     |                                       |                                        | 5.9                             | 62.6                         | 5.9                              | 5.9                   | 0                    |
| 2018 planting year |                        |                                       |                                        |                                 |                              | 731.8                            | 286.15                | 445.65               |

**Table B3.** The calculation of the water requirement of the Pea/Maize system.

| Date               | The order of ten-day | Mono-pea<br>ET <sub>c</sub><br>mm/dec | Relay-pea<br>ET <sub>c</sub><br>mm/dec | Maize ET <sub>c</sub><br>mm/dec | Effective<br>rainfall<br>mm/dec | System<br>ET <sub>c</sub><br>mm/dec | Green water<br>mm/dec | Blue water<br>mm/dec |
|--------------------|----------------------|---------------------------------------|----------------------------------------|---------------------------------|---------------------------------|-------------------------------------|-----------------------|----------------------|
| 2016/3             | 1                    | 5.6                                   | 2.8                                    |                                 | 0                               | 2.8                                 | 0                     | 2.8                  |
| 2016/3             | 2                    | 15.2                                  | 7.6                                    |                                 | 0                               | 7.6                                 | 0                     | 7.6                  |
| 2016/4             | 3                    | 26.1                                  | 13.05                                  |                                 | 0                               | 13.05                               | 0                     | 13.05                |
| 2016/4             | 4                    | 31.3                                  | 15.65                                  |                                 | 10                              | 15.65                               | 10                    | 5.65                 |
| 2016/4             | 5                    | 51.7                                  | 25.85                                  |                                 | 0                               | 25.85                               | 0                     | 25.85                |
| 2016/5             | 6                    | 49.1                                  | 24.55                                  |                                 | 6                               | 24.55                               | 6                     | 18.55                |
| 2016/5             | 7                    | 54.1                                  | 27.05                                  | 6                               | 28.4                            | 33.05                               | 28.4                  | 4.65                 |
| 2016/5             | 8                    | 49.1                                  | 24.55                                  | 13.9                            | 0                               | 38.45                               | 0                     | 38.45                |
| 2016/6             | 9                    | 13.7                                  | 6.85                                   | 15                              | 0                               | 21.85                               | 0                     | 21.85                |
| 2016/6             | 10                   |                                       |                                        | 28.7                            | 45.6                            | 28.7                                | 28.7                  | 0                    |
| 2016/6             | 11                   |                                       |                                        | 47.2                            | 39.5                            | 47.2                                | 39.5                  | 7.7                  |
| 2016/7             | 12                   |                                       |                                        | 34.1                            | 41                              | 34.1                                | 34.1                  | 0                    |
| 2016/7             | 13                   |                                       |                                        | 41                              | 45.8                            | 41                                  | 41                    | 0                    |
| 2016/7             | 14                   |                                       |                                        | 55.9                            | 46.7                            | 55.9                                | 46.7                  | 9.2                  |
| 2016/8             | 15                   |                                       |                                        | 34.8                            | 54.7                            | 34.8                                | 34.8                  | 0                    |
| 2016/8             | 16                   |                                       |                                        | 30.7                            | 43.1                            | 30.7                                | 30.7                  | 0                    |
| 2016/8             | 17                   |                                       |                                        | 46.4                            | 41.3                            | 46.4                                | 41.3                  | 5.1                  |
| 2016/9             | 18                   |                                       |                                        | 25.5                            | 1.3                             | 25.5                                | 1.3                   | 24.2                 |
| 2016/9             | 19                   |                                       |                                        | 8.6                             | 1.3                             | 8.6                                 | 1.3                   | 7.3                  |
| 2016 planting year |                      |                                       |                                        |                                 |                                 | 535.75                              | 343.80                | 191.95               |
| 2017/2             | 1                    | 0.9                                   | 0.45                                   |                                 | 0.3                             | 0.45                                | 0.3                   | 0.15                 |
| 2017/3             | 2                    | 9.8                                   | 4.9                                    |                                 | 0                               | 4.9                                 | 0                     | 4.9                  |
| 2017/3             | 3                    | 11.6                                  | 5.8                                    |                                 | 0                               | 5.8                                 | 0                     | 5.8                  |
| 2017/3             | 4                    | 18.8                                  | 9.4                                    |                                 | 9.2                             | 9.4                                 | 9.2                   | 0.2                  |
| 2017/4             | 5                    | 28                                    | 14                                     |                                 | 18.8                            | 14                                  | 14                    | 0                    |
| 2017/4             | 6                    | 41.9                                  | 20.95                                  |                                 | 5.8                             | 20.95                               | 5.8                   | 15.15                |
| 2017/4             | 7                    | 57.5                                  | 28.75                                  |                                 | 4                               | 28.75                               | 4                     | 24.75                |
| 2017/5             | 8                    | 57.2                                  | 28.6                                   |                                 | 6.7                             | 28.6                                | 6.7                   | 21.9                 |
| 2017/5             | 9                    | 60.2                                  | 30.1                                   | 3.3                             | 0                               | 33.4                                | 0                     | 33.4                 |
| 2017/5             | 10                   | 21.2                                  | 10.6                                   | 15.7                            | 13.6                            | 26.3                                | 13.6                  | 12.7                 |
| 2017/6             | 11                   |                                       |                                        | 15                              | 9.5                             | 15                                  | 9.5                   | 5.5                  |
| 2017/6             | 12                   |                                       |                                        | 28.7                            | 6                               | 28.7                                | 6                     | 22.7                 |
| 2017/6             | 13                   |                                       |                                        | 37.7                            | 47.2                            | 37.7                                | 37.7                  | 0                    |
| 2017/7             | 14                   |                                       |                                        | 52.8                            | 33.3                            | 52.8                                | 33.3                  | 19.5                 |
| 2017/7             | 15                   |                                       |                                        | 62.3                            | 21.2                            | 62.3                                | 21.2                  | 41.1                 |
| 2017/7             | 16                   |                                       |                                        | 27.7                            | 43.2                            | 27.7                                | 27.7                  | 0                    |
| 2017/8             | 17                   |                                       |                                        | 54                              | 30.4                            | 54                                  | 30.4                  | 23.6                 |
| 2017/8             | 18                   |                                       |                                        | 40.2                            | 40.5                            | 40.2                                | 40.2                  | 0                    |
| 2017/8             | 19                   |                                       |                                        | 28.9                            | 27.8                            | 28.9                                | 27.8                  | 1.1                  |
| 2017/9             | 20                   |                                       |                                        | 19.2                            | 0                               | 19.2                                | 0                     | 19.2                 |
| 2017/9             | 21                   |                                       |                                        | 7.5                             | 0                               | 7.5                                 | 0                     | 7.5                  |
| 2017 planting year |                      |                                       |                                        |                                 |                                 | 546.55                              | 287.40                | 259.15               |
| 2018/3             | 1                    | 3.4                                   | 1.7                                    |                                 | 0                               | 1.7                                 | 0                     | 1.70                 |
| 2018/3             | 2                    | 10.1                                  | 5.05                                   |                                 | 1.9                             | 5.05                                | 1.9                   | 3.15                 |
| 2018/3             | 3                    | 21.3                                  | 10.65                                  |                                 | 0                               | 10.65                               | 0                     | 10.65                |
| 2018/4             | 4                    | 34.8                                  | 17.4                                   |                                 | 3                               | 17.4                                | 3                     | 14.4                 |
| 2018/4             | 5                    | 50.6                                  | 25.3                                   |                                 | 14.3                            | 25.3                                | 14.3                  | 11                   |
| 2018/4             | 6                    | 44.6                                  | 22.3                                   |                                 | 40.1                            | 22.3                                | 22.3                  | 0                    |
| 2018/5             | 7                    | 51.2                                  | 25.6                                   |                                 | 14.5                            | 25.6                                | 14.5                  | 11.1                 |
| 2018/5             | 8                    | 37.2                                  | 18.6                                   |                                 | 50.9                            | 18.6                                | 18.6                  | 0                    |
| 2018/5             | 9                    | 46.7                                  | 23.35                                  | 10.9                            | 30.2                            | 34.25                               | 30.2                  | 4.05                 |
| 2018/6             | 10                   | 17.5                                  | 8.75                                   | 14.4                            | 27.8                            | 23.15                               | 23.15                 | 0                    |
| 2018/6             | 11                   |                                       |                                        | 20                              | 3.7                             | 20                                  | 3.7                   | 16.3                 |
| 2018/6             | 12                   |                                       |                                        | 44.7                            | 3.7                             | 44.7                                | 3.7                   | 41                   |
| 2018/7             | 13                   |                                       |                                        | 43.3                            | 6.2                             | 43.3                                | 6.2                   | 37.1                 |
| 2018/7             | 14                   |                                       |                                        | 52.2                            | 58.6                            | 52.2                                | 52.2                  | 0                    |
| 2018/7             | 15                   |                                       |                                        | 73.2                            | 25.4                            | 73.2                                | 25.4                  | 47.8                 |
| 2018/8             | 16                   |                                       |                                        | 52.3                            | 27.8                            | 52.3                                | 27.8                  | 24.5                 |
| 2018/8             | 17                   |                                       |                                        | 46.7                            | 62.6                            | 46.7                                | 46.7                  | 0                    |
| 2018/8             | 18                   |                                       |                                        | 42.8                            | 0.2                             | 42.8                                | 0.2                   | 42.6                 |
| 2018/9             | 19                   |                                       |                                        | 25.9                            | 0.7                             | 25.9                                | 0.7                   | 25.2                 |
| 2018/9             | 20                   |                                       |                                        | 4.2                             | 5                               | 4.2                                 | 4.2                   | 0                    |
| 2018 planting year |                      |                                       |                                        |                                 |                                 | 589.3                               | 298.75                | 290.55               |

**Table B4.** The calculation of the water requirement of the Soybean||Maize system.

| Date   | The order of ten-day | Mono-soybean<br>ET <sub>c</sub><br>mm/dec | Relay-soybean<br>ET <sub>c</sub><br>mm/dec | Maize<br>ET <sub>c</sub><br>mm/dec | Effective<br>rainfall<br>mm/dec | System<br>ET <sub>c</sub><br>mm/dec | Green water<br>mm/dec | Blue water<br>mm/dec |
|--------|----------------------|-------------------------------------------|--------------------------------------------|------------------------------------|---------------------------------|-------------------------------------|-----------------------|----------------------|
| 2016/5 | 1                    | 6.4                                       | 1.6                                        | 6                                  | 28.4                            | 7.6                                 | 7.6                   | 0                    |
| 2016/5 | 2                    | 14.9                                      | 3.725                                      | 13.9                               | 0                               | 17.625                              | 0                     | 17.625               |
| 2016/6 | 3                    | 14.8                                      | 3.7                                        | 15                                 | 0                               | 18.7                                | 0                     | 18.7                 |
| 2016/6 | 4                    | 28.9                                      | 7.225                                      | 28.7                               | 45.6                            | 35.925                              | 35.925                | 0                    |
| 2016/6 | 5                    | 50                                        | 12.5                                       | 47.2                               | 39.5                            | 59.7                                | 39.5                  | 20.2                 |
| 2016/7 | 6                    | 34.8                                      | 8.7                                        | 34.1                               | 41                              | 42.8                                | 41                    | 1.8                  |
| 2016/7 | 7                    | 38.5                                      | 9.625                                      | 41                                 | 45.8                            | 50.625                              | 45.8                  | 4.825                |
| 2016/7 | 8                    | 52.6                                      | 13.15                                      | 55.9                               | 46.7                            | 69.05                               | 46.7                  | 22.35                |
| 2016/8 | 9                    | 32.7                                      | 8.175                                      | 34.8                               | 54.7                            | 42.975                              | 42.975                | 0                    |
| 2016/8 | 10                   | 29                                        | 7.25                                       | 30.7                               | 43.1                            | 37.95                               | 37.95                 | 0                    |
| 2016/8 | 11                   | 49                                        | 12.25                                      | 46.4                               | 41.3                            | 58.65                               | 41.3                  | 17.35                |
| 2016/9 | 12                   | 30                                        | 7.5                                        | 25.5                               | 1.3                             | 33                                  | 1.3                   | 31.7                 |
| 2016/9 | 13                   | 12                                        | 3                                          | 8.6                                | 1.3                             | 11.6                                | 1.3                   | 10.3                 |
|        | 2016 planting year   |                                           |                                            |                                    |                                 | 486.2                               | 341.35                | 144.85               |
| 2017/5 | 1                    | 3.3                                       | 0.825                                      | 3.3                                | 0                               | 4.125                               | 0                     | 4.125                |
| 2017/5 | 2                    | 15.7                                      | 3.925                                      | 15.7                               | 13.6                            | 19.625                              | 13.6                  | 6.025                |
| 2017/6 | 3                    | 13.8                                      | 3.45                                       | 15                                 | 9.5                             | 18.45                               | 9.5                   | 8.95                 |
| 2017/6 | 4                    | 28.2                                      | 7.05                                       | 28.7                               | 6                               | 35.75                               | 6                     | 29.75                |
| 2017/6 | 5                    | 40.2                                      | 10.05                                      | 37.7                               | 47.2                            | 47.75                               | 47.2                  | 0.55                 |
| 2017/7 | 6                    | 53.8                                      | 13.45                                      | 52.8                               | 33.3                            | 66.25                               | 33.3                  | 32.95                |
| 2017/7 | 7                    | 58.5                                      | 14.625                                     | 62.3                               | 21.2                            | 76.925                              | 21.2                  | 55.725               |
| 2017/7 | 8                    | 26.1                                      | 6.525                                      | 27.7                               | 43.2                            | 34.225                              | 34.225                | 0                    |
| 2017/8 | 9                    | 50.7                                      | 12.675                                     | 54                                 | 30.4                            | 66.675                              | 30.4                  | 36.275               |
| 2017/8 | 10                   | 38                                        | 9.5                                        | 40.2                               | 40.5                            | 49.7                                | 40.5                  | 9.2                  |
| 2017/8 | 11                   | 30.5                                      | 7.625                                      | 28.9                               | 27.8                            | 36.525                              | 27.8                  | 8.725                |
| 2017/9 | 12                   | 23                                        | 5.75                                       | 19.2                               | 0                               | 24.95                               | 0                     | 24.95                |
| 2017/9 | 13                   | 10.7                                      | 2.675                                      | 7.5                                | 0                               | 10.175                              | 0                     | 10.175               |
|        | 2017 planting year   |                                           |                                            |                                    |                                 | 491.125                             | 263.73                | 227.40               |
| 2018/5 | 1                    | 10.9                                      | 2.725                                      | 10.9                               | 30.2                            | 13.625                              | 13.625                | 0                    |
| 2018/6 | 2                    | 14.4                                      | 3.6                                        | 14.4                               | 27.8                            | 18                                  | 18                    | 0                    |
| 2018/6 | 3                    | 18.1                                      | 4.525                                      | 20                                 | 3.7                             | 24.525                              | 3.7                   | 20.825               |
| 2018/6 | 4                    | 45.7                                      | 11.425                                     | 44.7                               | 3.7                             | 56.125                              | 3.7                   | 52.425               |
| 2018/7 | 5                    | 45.6                                      | 11.4                                       | 43.3                               | 6.2                             | 54.7                                | 6.2                   | 48.5                 |
| 2018/7 | 6                    | 49.1                                      | 12.275                                     | 52.2                               | 58.6                            | 64.475                              | 58.6                  | 5.875                |
| 2018/7 | 7                    | 68.8                                      | 17.2                                       | 73.2                               | 25.4                            | 90.4                                | 25.4                  | 65                   |
| 2018/8 | 8                    | 49.1                                      | 12.275                                     | 52.3                               | 27.8                            | 64.575                              | 27.8                  | 36.775               |
| 2018/8 | 9                    | 44.2                                      | 11.05                                      | 46.7                               | 62.6                            | 57.75                               | 57.75                 | 0                    |
| 2018/8 | 10                   | 45.5                                      | 11.375                                     | 42.8                               | 0.2                             | 54.175                              | 0.2                   | 53.975               |
| 2018/9 | 11                   | 31.9                                      | 7.975                                      | 25.9                               | 0.7                             | 33.875                              | 0.7                   | 33.175               |
| 2018/9 | 12                   | 6.2                                       | 1.55                                       | 4.2                                | 5                               | 5.75                                | 5                     | 0.75                 |
|        | 2018 planting year   |                                           |                                            |                                    |                                 | 537.975                             | 220.68                | 317.30               |

### C. Agricultural materials water consumption

The water consumption of the input materials was converted by using relevant parameters in the life cycle assessment database. All the raw data of agricultural materials input obtained from the experimental records as shown in Table C1. The water consumption parameters of the inputs and its resources are shown in Table C2.

**Table C1.** The input of agricultural capital goods in different cropping systems.

| Systems                   | Nitrogen                          | Potassium                      | Phosphate                                         | Phosphate                                        | Herbicide | Chemicals | Bactericide | Electricity | Diesel | Plastic mulching | Seeds |       |
|---------------------------|-----------------------------------|--------------------------------|---------------------------------------------------|--------------------------------------------------|-----------|-----------|-------------|-------------|--------|------------------|-------|-------|
|                           | CO(NH <sub>2</sub> ) <sub>2</sub> | K <sub>2</sub> SO <sub>4</sub> | (NH <sub>4</sub> ) <sub>2</sub> ·HPO <sub>4</sub> | Ca(H <sub>2</sub> PO <sub>4</sub> ) <sub>2</sub> |           | Pesticide |             |             |        |                  | Crops | Maize |
|                           | kg/ha                             | kg/ha                          | kg/ha                                             | kg/ha                                            | kg/ha     | kg/ha     | kg/ha       | kW • h/ha   | kg/ha  | kg/ha            | kg/ha | kg/ha |
| Winter wheat-summer maize | 973                               | 630                            | 408                                               | -                                                | 1.00      | 0.12      | 0.6         | 2777        | 242    | -                | 300   | 27    |
| Mono-spring maize         | 583                               | 180                            | 163                                               | -                                                | 0.50      | 0.06      | 0.3         | 717         | 156    | -                | -     | 27    |
| Rye-spring maize          | 583                               | 180                            | 313                                               | -                                                | 0.50      | 0.06      | 0.3         | 2133        | 242    | -                | 112.5 | 27    |
| Spinach-spring maize      | 869                               | 300                            | 261                                               | -                                                | 0.50      | 0.06      | 0.3         | 1867        | 207    | -                | 75    | 27    |
| Vetch-spring maize        | 583                               | 180                            | 163                                               | 151                                              | 0.50      | 0.06      | 0.3         | 2283        | 264    | -                | 60    | 27    |
| Potato/spring maize       | 583                               | 800                            | 163                                               | -                                                | 0.00      | 3.06      | 0.9         | 2500        | 143    | 119              | 1775  | 27    |
| Pea/spring maize          | 583                               | 180                            | 163                                               | -                                                | 0.00      | 0.36      | 0.3         | 2050        | 143    | -                | 60    | 27    |
| Soybean  spring maize     | 583                               | 180                            | 163                                               | -                                                | 0.00      | 0.09      | 0.3         | 717         | 156    | -                | 20    | 27    |

**Table C2.** The water consumption parameters of the agricultural means of production.

| Items            |                                                  | Database              | Unit      | Parameters |
|------------------|--------------------------------------------------|-----------------------|-----------|------------|
| Nitrogen         | CO(NH <sub>2</sub> ) <sub>2</sub>                | CLCD-China-ECER 0.8.1 | kg/kg     | 192.01     |
| Potassium        | K <sub>2</sub> SO <sub>4</sub>                   | CLCD-China-ECER 0.8.1 | kg/kg     | 51.83      |
| Phosphate        | (NH <sub>4</sub> ) <sub>2</sub> HPO <sub>4</sub> | CLCD-China-ECER 0.8.1 | kg/kg     | 143.52     |
| Phosphate        | Ca(H <sub>2</sub> PO <sub>4</sub> ) <sub>2</sub> | CLCD-China-ECER 0.8.1 | kg/kg     | 71.59      |
| Chemicals        | Herbicide                                        | Ecoinvent 2.2         | kg/kg     | 23000      |
|                  | Pesticide                                        | Ecoinvent 2.2         | kg/kg     | 220000     |
|                  | Bactericide                                      | Ecoinvent 2.2         | kg/kg     | 160000     |
| Electricity      | Power<br>(the North China Plain)                 | CLCD-China-ECER 0.8.1 | kg/kW · h | 3.57       |
| Diesel           | Diesel                                           | CLCD-China-ECER 0.8.1 | kg/kg     | 6.11       |
| Plastic Mulching | Plastic film                                     | Ecoinvent 3.1.0       | kg/kg     | 0.0026     |
| Seeds            | Wheat                                            | Ecoinvent 3.1.0       | kg/kg     | 0.36       |
|                  | Rye                                              | Ecoinvent 3.1.0       | kg/kg     | 0.184      |
|                  | Spinach                                          | Ecoinvent 3.1.0       | kg/kg     | 0.0087     |
|                  | Potato                                           | Ecoinvent 3.1.0       | kg/kg     | 0.114      |
|                  | Pea                                              | Ecoinvent 3.1.0       | kg/kg     | 0.085      |
|                  | Soybean                                          | Ecoinvent 3.1.0       | kg/kg     | 0.062      |
|                  | Maize                                            | Ecoinvent 3.1.0       | kg/kg     | 0.0059     |

Note: Vetch seed parameter was not in the database. According to the calculation results of other crop seeds, the water consumption of the seed production only account for less than 1% of the total agricultural material water footprint, the error of missing data can be ignored.

#### D. Grey water

The critical dilution volume method is usually used to calculate the grey water demand:

$$GW = \frac{L_p}{C_{max} - C_{nat}} \quad (1)$$

$$L_p = F_N \cdot (l_\alpha + l_\beta) \quad (2)$$

where  $GW$  (m<sup>3</sup>/ha) is the grey water demand,  $L_p$  (kg) is the amount of pollutants that go into the natural water body caused by each hectare of cultivated land,  $C_{max}$  (kg/m<sup>3</sup>) is the concentration of the maximum pollutant that the water body can afford and  $C_{max}(\text{Nitrogen})=3.1$  mg/L;  $C_{nat}$  (kg/m<sup>3</sup>) is the natural concentration of the pollutant in water,  $C_{nat}(\text{Nitrogen})=1.5$ mg/L.  $F_N$  (kg/ha) is the annual nitrogen requirement of the cropping system,  $l_\alpha$  is the total nitrogen coefficient of the fertilizer lost in the form of underground leaching,  $l_\beta$  is the total nitrogen coefficient of the fertilizer lost in the form of surface runoff, see Table D1.

**Table D1.** Total nitrogen loss rates of different cropping systems.

| Systems                   | Annual nitrogen requirement | $l_\alpha$ (%) | $l_\beta$ (%) |
|---------------------------|-----------------------------|----------------|---------------|
| Winter wheat-summer maize | 525                         | 1.393          | 0.95          |
| Mono-spring maize         | 300                         | 0.767          | 0.563         |
| Rye-spring maize          | 327                         | 1.534          | 0.95          |
| Spinach-spring maize      | 450                         | 1.534          | 0.95          |
| Vetch-spring maize        | 300                         | 1.534          | 0.95          |
| Potato/spring maize       | 330                         | 1.534          | 0.95          |
| Pea/spring maize          | 330                         | 1.534          | 0.95          |
| Soybean  spring maize     | 300                         | 1.534          | 0.95          |

Note: The annual nitrogen requirement refers to the nitrogen element amount, which is differ from nitrogen fertilizer amount. But it can be converted from nitrogen fertilizer.  $l_\alpha$  and  $l_\beta$  were cited from the China first national pollution source survey.

### E. Results showed in table form.

Results were showed in below table (From E1 to E4) in order to display the result in number form.

**Table E1.** The total water consumption and its composition of multiple cropping systems.

| Systems                   | Crop water demand<br>m <sup>3</sup> /ha | Fallow period soil evaporation<br>m <sup>3</sup> /ha | Agricultural materials water consumption<br>m <sup>3</sup> /ha | Grey water<br>m <sup>3</sup> /ha | Total<br>m <sup>3</sup> /ha |
|---------------------------|-----------------------------------------|------------------------------------------------------|----------------------------------------------------------------|----------------------------------|-----------------------------|
| 2016 planting year        |                                         |                                                      |                                                                |                                  |                             |
| Winter wheat-summer maize | 8150                                    | 98                                                   | 435                                                            | 7688                             | 16371                       |
| Mono-spring maize         | 3878                                    | 1182                                                 | 221                                                            | 2494                             | 7775                        |
| Rye-spring maize          | 7451                                    | 103                                                  | 248                                                            | 5077                             | 12879                       |
| Spinach-spring maize      | 6135                                    | 265                                                  | 301                                                            | 6986                             | 13686                       |
| Vetch-spring maize        | 7311                                    | 208                                                  | 238                                                            | 4658                             | 12415                       |
| Potato/spring maize       | 6611                                    | 1149                                                 | 1004                                                           | 5123                             | 13887                       |
| Pea/spring maize          | 5354                                    | 1002                                                 | 280                                                            | 5123                             | 11759                       |
| Soybean  spring maize     | 4862                                    | 1182                                                 | 216                                                            | 2494                             | 8754                        |
| 2017 planting year        |                                         |                                                      |                                                                |                                  |                             |
| Winter wheat-summer maize | 8056                                    | 94                                                   | 435                                                            | 7688                             | 16273                       |
| Mono-spring maize         | 3929                                    | 1179                                                 | 221                                                            | 2494                             | 7823                        |
| Rye-spring maize          | 7883                                    | 94                                                   | 248                                                            | 5077                             | 13302                       |
| Spinach-spring maize      | 5902                                    | 339                                                  | 301                                                            | 6986                             | 13527                       |
| Vetch-spring maize        | 7034                                    | 194                                                  | 238                                                            | 4658                             | 12124                       |
| Potato/spring maize       | 7570                                    | 915                                                  | 1004                                                           | 5123                             | 14612                       |
| Pea/spring maize          | 5465                                    | 766                                                  | 280                                                            | 5123                             | 11634                       |
| Soybean  spring maize     | 4910                                    | 1179                                                 | 216                                                            | 2494                             | 8799                        |
| 2018 planting year        |                                         |                                                      |                                                                |                                  |                             |
| Winter wheat-summer maize | 8901                                    | 87                                                   | 435                                                            | 7688                             | 17111                       |
| Mono-spring maize         | 4306                                    | 1285                                                 | 221                                                            | 2494                             | 8306                        |
| Rye-spring maize          | 7269                                    | 310                                                  | 248                                                            | 5077                             | 12903                       |
| Spinach-spring maize      | 6647                                    | 376                                                  | 301                                                            | 6986                             | 14309                       |
| Vetch-spring maize        | 7933                                    | 240                                                  | 238                                                            | 4658                             | 13069                       |
| Potato/spring maize       | 7318                                    | 1072                                                 | 1004                                                           | 5123                             | 14517                       |
| Pea/spring maize          | 5893                                    | 923                                                  | 280                                                            | 5123                             | 12219                       |
| Soybean  spring maize     | 5380                                    | 1285                                                 | 216                                                            | 2494                             | 9375                        |
| 3-year average            |                                         |                                                      |                                                                |                                  |                             |
| Winter wheat-summer maize | 8369                                    | 93                                                   | 435                                                            | 7688                             | 16585                       |
| Mono-spring maize         | 4038                                    | 1215                                                 | 221                                                            | 2494                             | 7968                        |
| Rye-spring maize          | 7534                                    | 169                                                  | 248                                                            | 5077                             | 13028                       |
| Spinach-spring maize      | 6228                                    | 326                                                  | 301                                                            | 6986                             | 13841                       |
| Vetch-spring maize        | 7426                                    | 214                                                  | 238                                                            | 4658                             | 12536                       |
| Potato/spring maize       | 7166                                    | 1045                                                 | 1004                                                           | 5123                             | 14339                       |
| Pea/spring maize          | 5571                                    | 897                                                  | 280                                                            | 5123                             | 11871                       |
| Soybean  spring maize     | 5051                                    | 1215                                                 | 216                                                            | 2494                             | 8976                        |

**Table E2.** The infield water consumption and its composition of multiple cropping systems.

| Systems                        | Green water<br>mm | Blue water<br>mm | Fallow period soil evaporation<br>mm | Total<br>mm |
|--------------------------------|-------------------|------------------|--------------------------------------|-------------|
| 2016 planting year             |                   |                  |                                      |             |
| Winter wheat-summer maize      | 268.4             | 546.6            | 9.8                                  | 824.8       |
| Mono-spring maize              | 306.0             | 81.8             | 118.2                                | 506.0       |
| Rye-spring maize               | 343.7             | 401.4            | 10.3                                 | 755.4       |
| Spinach-spring maize           | 333.6             | 279.9            | 26.5                                 | 640.0       |
| Vetch-spring maize             | 318.7             | 412.4            | 20.8                                 | 751.9       |
| Potato/spring maize            | 291.2             | 369.9            | 114.9                                | 776.0       |
| Potato/spring maize (Modified) | 369.6             | 217.9            | 100.2                                | 687.7       |
| Pea/spring maize               | 343.5             | 192.0            | 100.2                                | 635.6       |
| Soybean  spring maize          | 341.4             | 144.9            | 118.2                                | 604.4       |
| 2017 planting year             |                   |                  |                                      |             |
| Winter wheat-summer maize      | 296.1             | 509.5            | 9.4                                  | 815.0       |
| Mono-spring maize              | 247.3             | 145.6            | 117.9                                | 510.8       |
| Rye-spring maize               | 326.4             | 461.9            | 9.4                                  | 797.7       |
| Spinach-spring maize           | 295.6             | 294.6            | 33.9                                 | 624.1       |
| Vetch-spring maize             | 321.8             | 381.6            | 19.4                                 | 722.8       |
| Potato/spring maize            | 213.7             | 543.3            | 91.5                                 | 848.5       |
| Pea/spring maize               | 287.3             | 259.2            | 76.6                                 | 623.1       |
| Soybean  spring maize          | 263.6             | 227.4            | 117.9                                | 609.0       |
| 2018 planting year             |                   |                  |                                      |             |
| Winter wheat-summer maize      | 319.8             | 570.3            | 8.7                                  | 898.8       |
| Mono-spring maize              | 196.2             | 234.4            | 128.5                                | 559.1       |
| Rye-spring maize               | 221.2             | 505.7            | 31.0                                 | 757.9       |
| Spinach-spring maize           | 211.1             | 453.6            | 37.6                                 | 702.3       |
| Vetch-spring maize             | 241.4             | 551.9            | 24.0                                 | 817.3       |
| Potato/spring maize            | 286.1             | 445.7            | 107.2                                | 838.9       |
| Pea/spring maize               | 298.7             | 290.6            | 92.3                                 | 681.6       |
| Soybean  spring maize          | 220.7             | 317.3            | 128.5                                | 666.5       |
| 3-year average                 |                   |                  |                                      |             |
| Winter wheat-summer maize      | 294.8             | 542.1            | 9.3                                  | 846.2       |
| Mono-spring maize              | 249.8             | 153.9            | 121.5                                | 525.3       |
| Rye-spring maize               | 297.1             | 456.3            | 16.9                                 | 770.3       |
| Spinach-spring maize           | 280.1             | 342.7            | 32.6                                 | 655.4       |
| Vetch-spring maize             | 294.0             | 448.6            | 21.4                                 | 764.0       |
| Potato/spring maize            | 263.6             | 453.0            | 104.5                                | 821.1       |
| Pea/spring maize               | 309.8             | 247.3            | 89.7                                 | 646.7       |
| Soybean  spring maize          | 275.2             | 229.9            | 121.5                                | 626.6       |
| Winter wheat-summer maize      | 294.8             | 542.1            | 9.3                                  | 846.2       |

**Table E3.** The crop's water requirement and its composition.

| Crops              | ETc<br>mm | From Rainfall<br>mm | From Irrigation<br>mm |
|--------------------|-----------|---------------------|-----------------------|
| 2016 planting year |           |                     |                       |
| Winter wheat       | 502.7     | 71.1                | 431.6                 |
| Summer maize       | 312.3     | 197.3               | 115                   |
| Spring maize I     | 480.6     | 290.6               | 190                   |
| Spring maize II    | 461.4     | 285.8               | 175.6                 |
| Spring maize III   | 387.8     | 306                 | 81.8                  |
| Rye                | 357.3     | 37.7                | 319.6                 |
| Spinach            | 225.7     | 27.6                | 198.1                 |
| Vetch              | 250.5     | 28.1                | 222.4                 |
| Potato             | 399.4     | 129.4               | 270                   |
| Pea                | 295.2     | 43.6                | 251.6                 |
| Soybean            | 393.7     | 301                 | 92.7                  |
| 2017 planting year |           |                     |                       |
| Winter wheat       | 471.1     | 97.2                | 373.9                 |
| Summer maize       | 334.5     | 198.9               | 135.6                 |
| Spring maize I     | -         | -                   | -                     |
| Spring maize II    | 546.2     | 194.7               | 351.5                 |
| Spring maize III   | 392.9     | 247.3               | 145.6                 |
| Rye                | 395.4     | 79.1                | 316.3                 |
| Spinach            | 197.3     | 48.3                | 149                   |
| Vetch              | 310.5     | 74.5                | 236                   |
| Potato             | 421.5     | 73.6                | 347.9                 |
| Pea                | 307.2     | 58.1                | 249.1                 |
| Soybean            | 392.5     | 245.9               | 146.6                 |
| 2018 planting year |           |                     |                       |
| Winter wheat       | 502.5     | 152.7               | 349.8                 |
| Summer maize       | 387.6     | 167.1               | 220.5                 |
| Spring maize I     | -         | -                   | -                     |
| Spring maize II    | 531.7     | 241.1               | 290.6                 |
| Spring maize III   | 430.6     | 196.2               | 234.4                 |
| Rye                | 296.3     | 25                  | 271.3                 |
| Spinach            | 234.1     | 14.9                | 219.2                 |
| Vetch              | 362.7     | 45.2                | 317.5                 |
| Potato             | 400.1     | 174.4               | 225.7                 |
| Pea                | 317.4     | 155                 | 162.4                 |
| Soybean            | 429.5     | 192.6               | 236.9                 |

Note: Spring maize I represents the maize planted in vetch–spring maize plots in the 2016 planting year, the sowing date was April 9. Its sowing date in the 2017 and 2018 planting years was the same as spring maize III. Spring maize II is the maize of the potato/spring maize cropping system, the sowing date was usually earlier than the other spring maize. Spring maize III represents the maize in other cropping systems, they had the same sowing date in the middle of May.

**Table E4.** The feeding population of the cropping system and its water consumption of a single person.

| Systems                   | Total supply of population | Blue water<br>(3-year average) | Unit cost              |
|---------------------------|----------------------------|--------------------------------|------------------------|
|                           | person/year                | m <sup>3</sup> /ha             | m <sup>3</sup> /person |
| Winter wheat-summer maize | 116                        | 5421                           | 143                    |
| Mono-spring maize         | 57                         | 1539                           | 139                    |
| Rye-spring maize          | 58                         | 4563                           | 226                    |
| Spinach-spring maize      | 84                         | 3427                           | 164                    |
| Vetch-spring maize        | 60                         | 4486                           | 211                    |
| Potato/spring maize       | 81                         | 4530                           | 177                    |
| Pea/spring maize          | 70                         | 2473                           | 169                    |
| Soybean/spring maize      | 56                         | 2299                           | 160                    |

Note: In the soybean-spring maize cropping system, soybeans were treated as the green manure, which did not have contribution to the yield. The maize yield had been slightly affected as well.
